# Supplementary material for: Advantages of eutectic alloys for creating catalysts in the realm of nanotechnology-enabled metallurgy
Source: PubMed Central journal article supplement (PMC6789138; doi:10.1038/s41467-019-12615-6), 2019-10-11
Supplement: 41467_2019_12615_MOESM1_ESM.pdf [file 41467_2019_12615_MOESM1_ESM.pdf]

## Supplementary Information:

# Advantages of eutectic alloys for creating catalysts in the realm of nanotechnology-enabled metallurgy

Jianbo Tang<sup>1</sup>, Rahman Daiyan<sup>1</sup>, Mohammad B. Ghasemian<sup>1</sup>, Shuhada A. Idrus-Saidi<sup>1</sup>, Ali Zavabeti<sup>2,3</sup>, Torben Daeneke<sup>2</sup>, Jiong Yang<sup>1</sup>, Pramod Koshy<sup>4</sup>, Soshan Cheong<sup>5</sup>, Richard D. Tilley<sup>5,6,7</sup>, Richard B. Kaner<sup>8,9</sup>, Rose Amal<sup>1</sup> & Kouros Kalantar-Zadeh<sup>1\*</sup>

<sup>1</sup> School of Chemical Engineering, University of New South Wales (UNSW), Sydney, NSW 2052, Australia

<sup>2</sup> School of Engineering, RMIT University, Melbourne, VIC 3001, Australia

<sup>3</sup> College of Material Science and Technology, Nanjing University of Aeronautics and Astronautics, 29 Jiangjun Ave, 211100 Nanjing, China

<sup>4</sup> School of Materials Science and Engineering, UNSW, Sydney, NSW 2052, Australia

<sup>5</sup> Mark Wainwright Analytical Centre, UNSW, Sydney, NSW 2052, Australia

<sup>6</sup> School of Chemistry, UNSW, Sydney, NSW 2052, Australia

<sup>7</sup> Australian Centre for NanoMedicine, UNSW, Sydney, NSW 2052, Australia

<sup>8</sup> Department of Chemistry and Biochemistry, University of California, Los Angeles (UCLA), Los Angeles, CA 90095, USA

<sup>9</sup> Department of Materials Science and Engineering, UCLA, Los Angeles, CA 90095, USA

\*Correspondence to K.K.-Z. (email: k.kalantar-zadeh@unsw.edu.au)

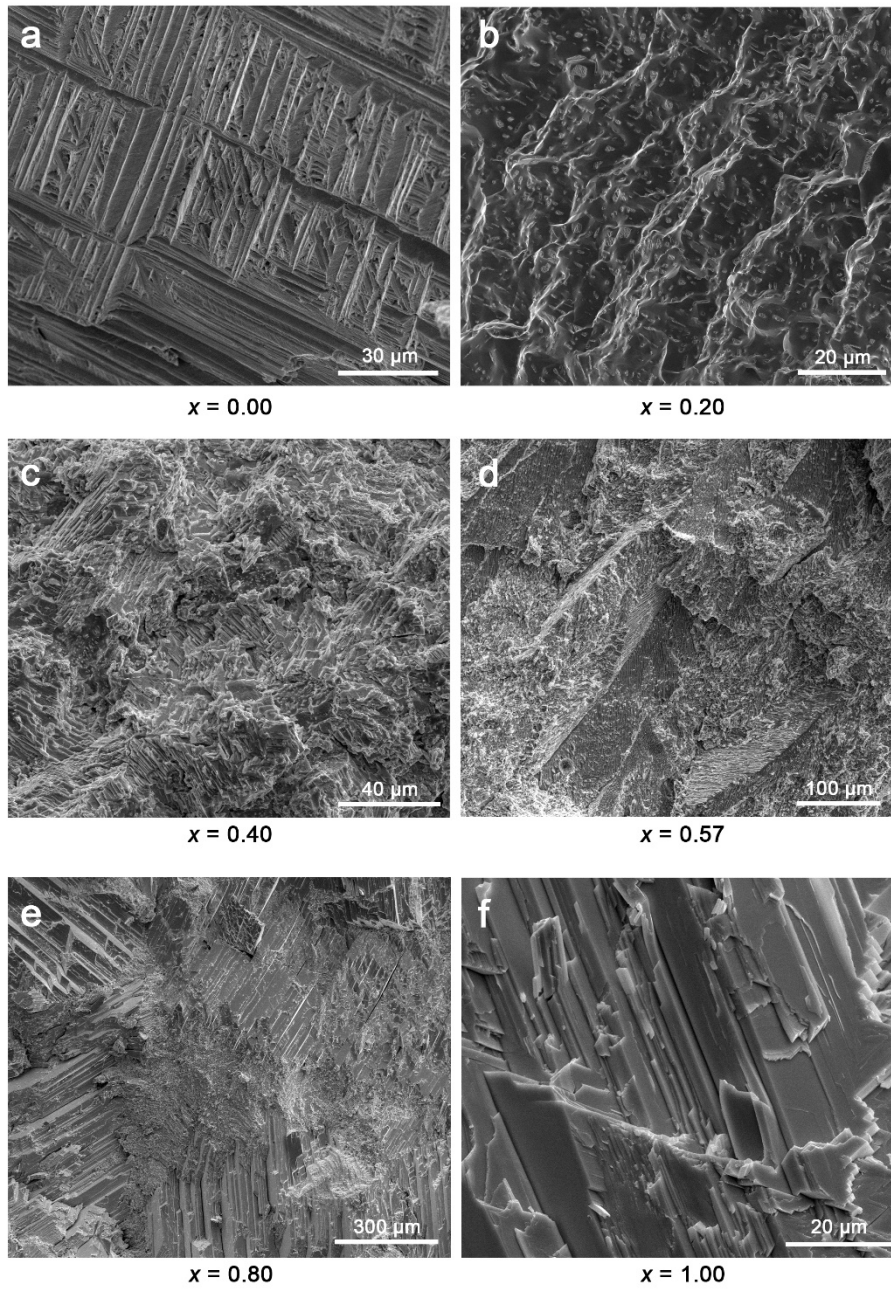

**Supplementary Figure 1.** Additional SEM images of the microstructures of the  $\text{Bi}_x\text{Sn}_{1-x}$  bulk alloy samples and the Sn, Bi metals.

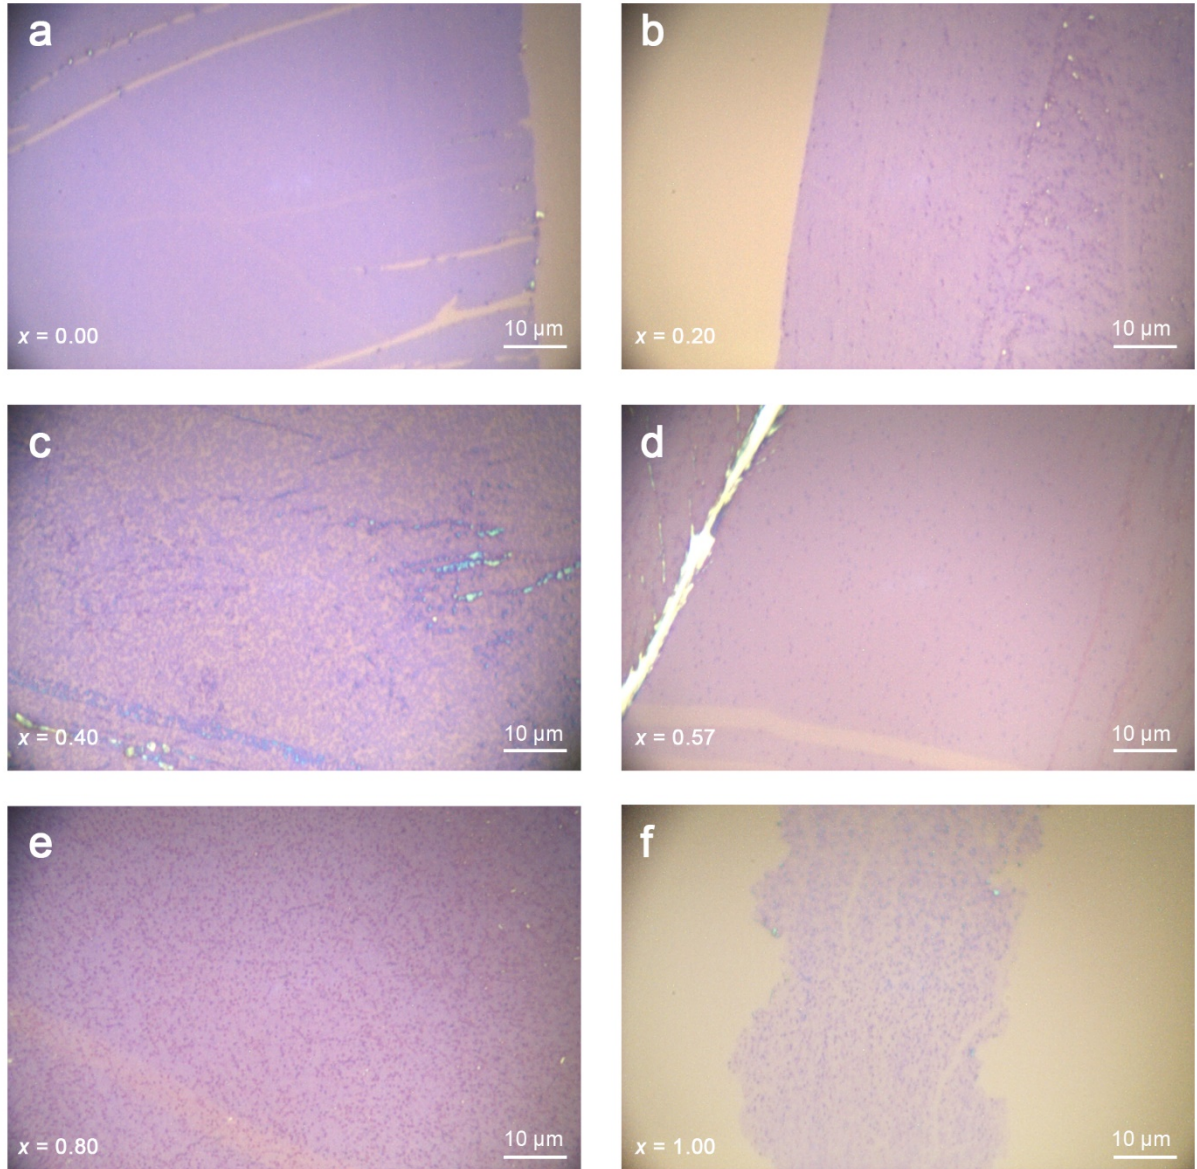

**Supplementary Figure 2.** Optical images of surface oxide layers for Raman tests. The oxide layers are touch-printed from liquid  $\text{Bi}_x\text{Sn}_{1-x}$  bulk alloys in ambient air using silicon substrates.

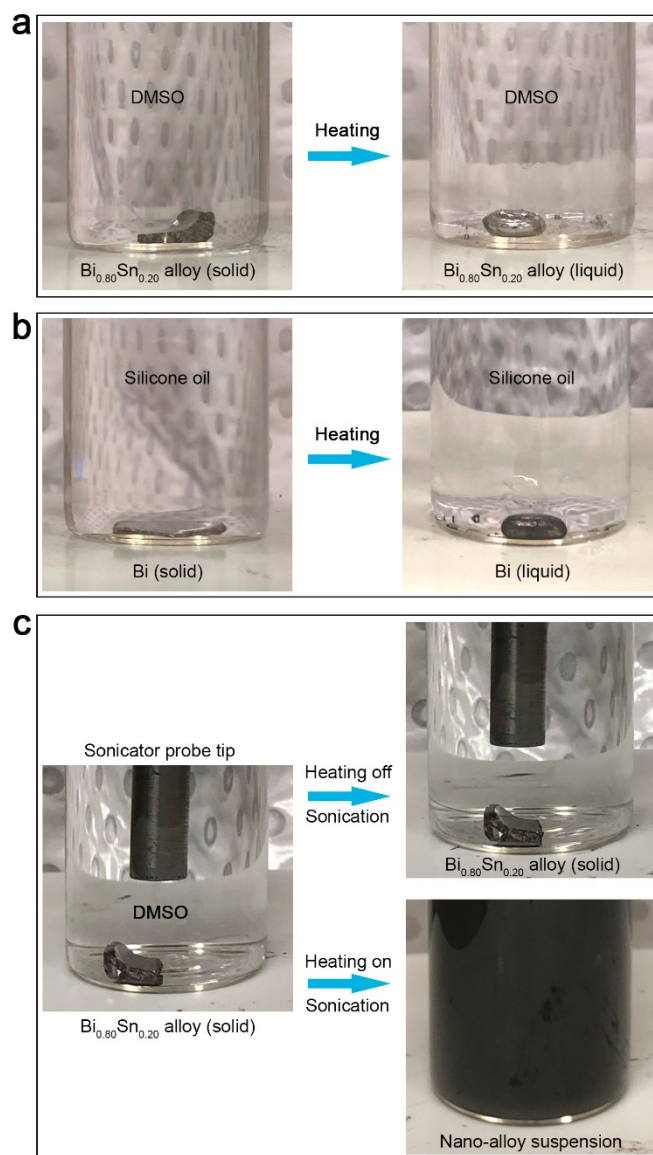

**Supplementary Figure 3.** Demonstration of the liquefied state of the samples and the necessity of heating. **a** The  $\text{Bi}_{0.80}\text{Sn}_{0.20}$  sample in DMSO solvent. **b** The Bi metal control sample in silicone oil. **c** Comparison of sonicating with and without heating to show that heating is necessary to fragment the liquid alloy into droplets. The hotplate is set to  $400^\circ\text{C}$  and its surface temperature is measured to be  $397.4 \pm 0.4^\circ\text{C}$  by an infrared thermometer.

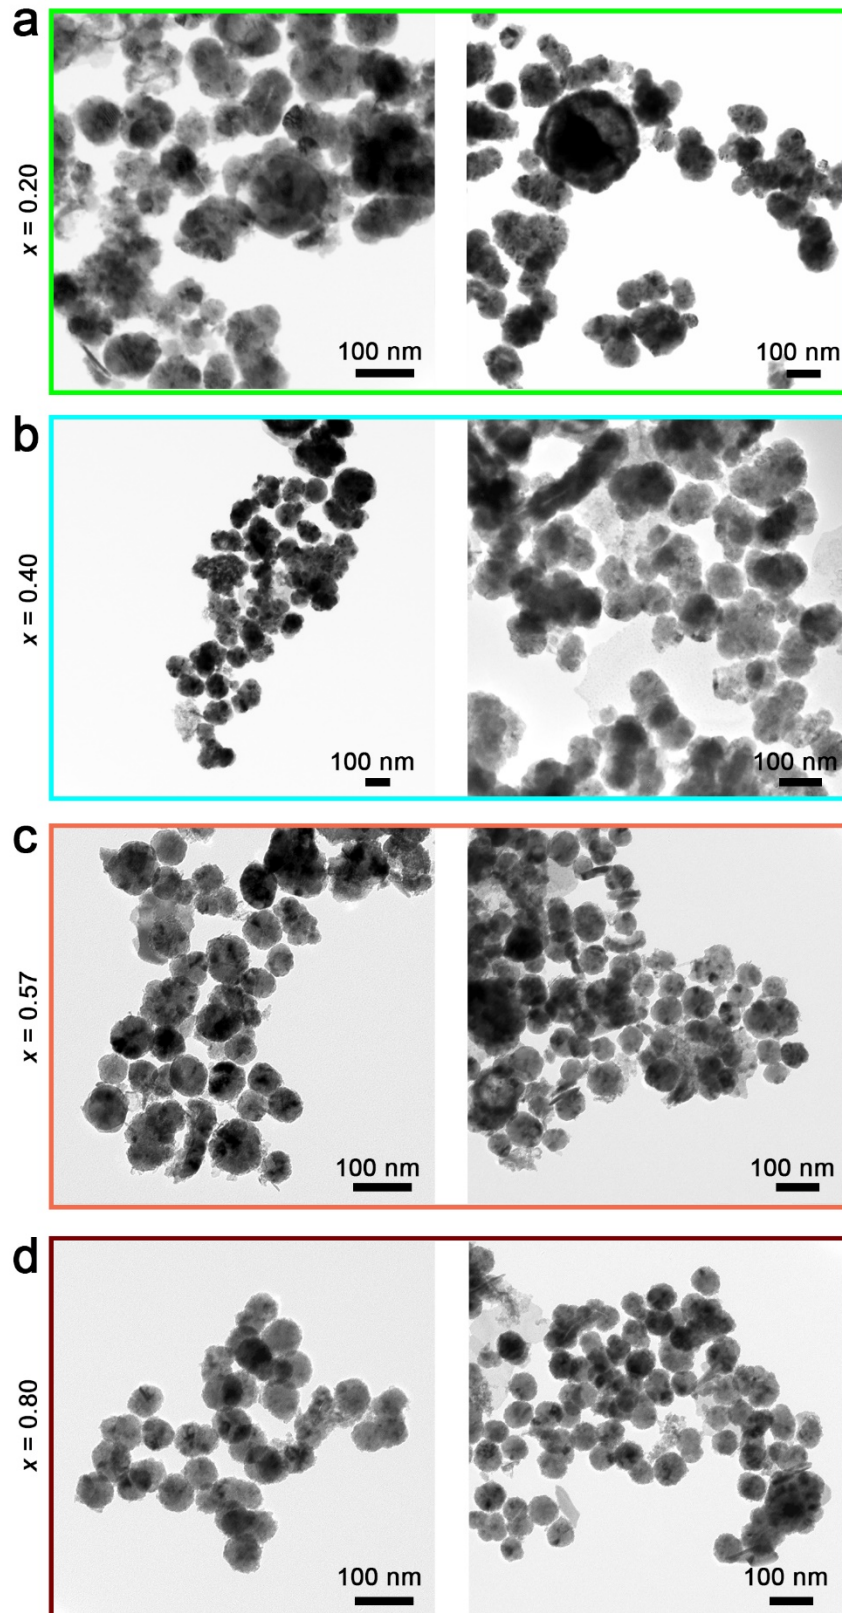

**Supplementary Figure 4.** Additional TEM images of the  $\text{Bi}_x\text{Sn}_{1-x}$  nano-alloy samples prepared in this study. Some large particles typically  $> 200$  nm are occasionally seen.

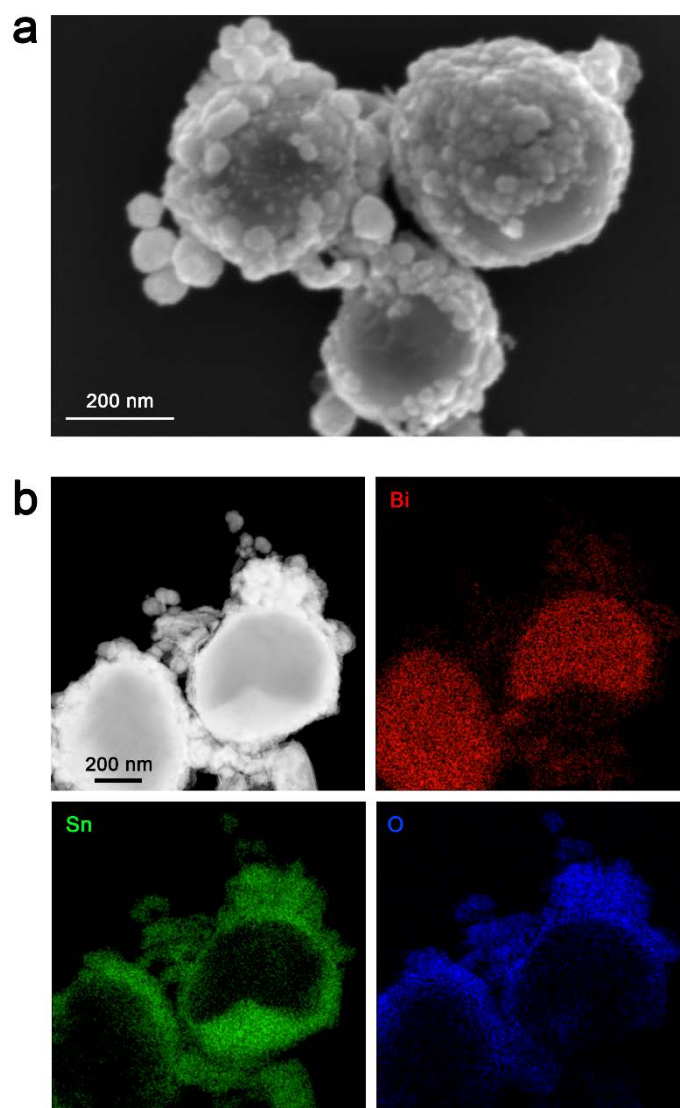

**Supplementary Figure 5.** **a** SEM images of the large particles that are usually partially coated by small particles to form core-shell structures. **b** TEM image and STEM-EDX mapping showing the element distribution in the Bi-rich cores and the shells composed of small particles.

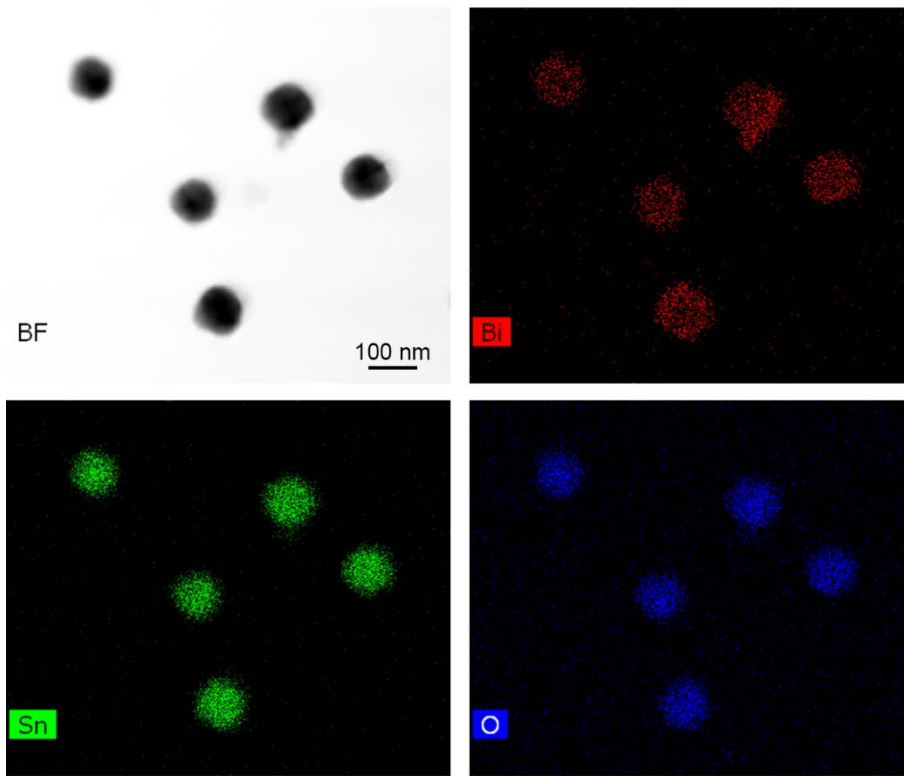

**Supplementary Figure 6.** Additional TEM-EDX mapping results of small particles of the eutectic nano-alloy sample.

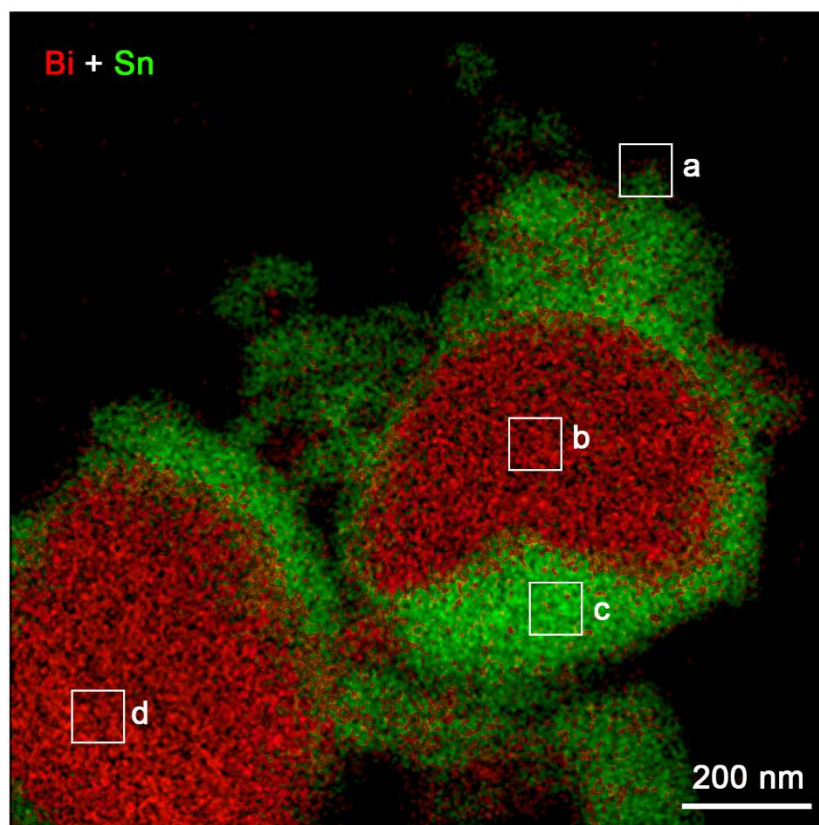

| Element | Atom % |    |    |    |
|---------|--------|----|----|----|
|         | a      | b  | c  | d  |
| Sn      | 91     | 30 | 95 | 10 |
| Bi      | 9      | 70 | 5  | 90 |

**Supplementary Figure 7.** Relative Bi-Sn atomic ratio in the small particle (a), Bi-rich cores of the large particles (b, d), and the small-particle-containing shell (c). The values are obtained from EDX spectra.



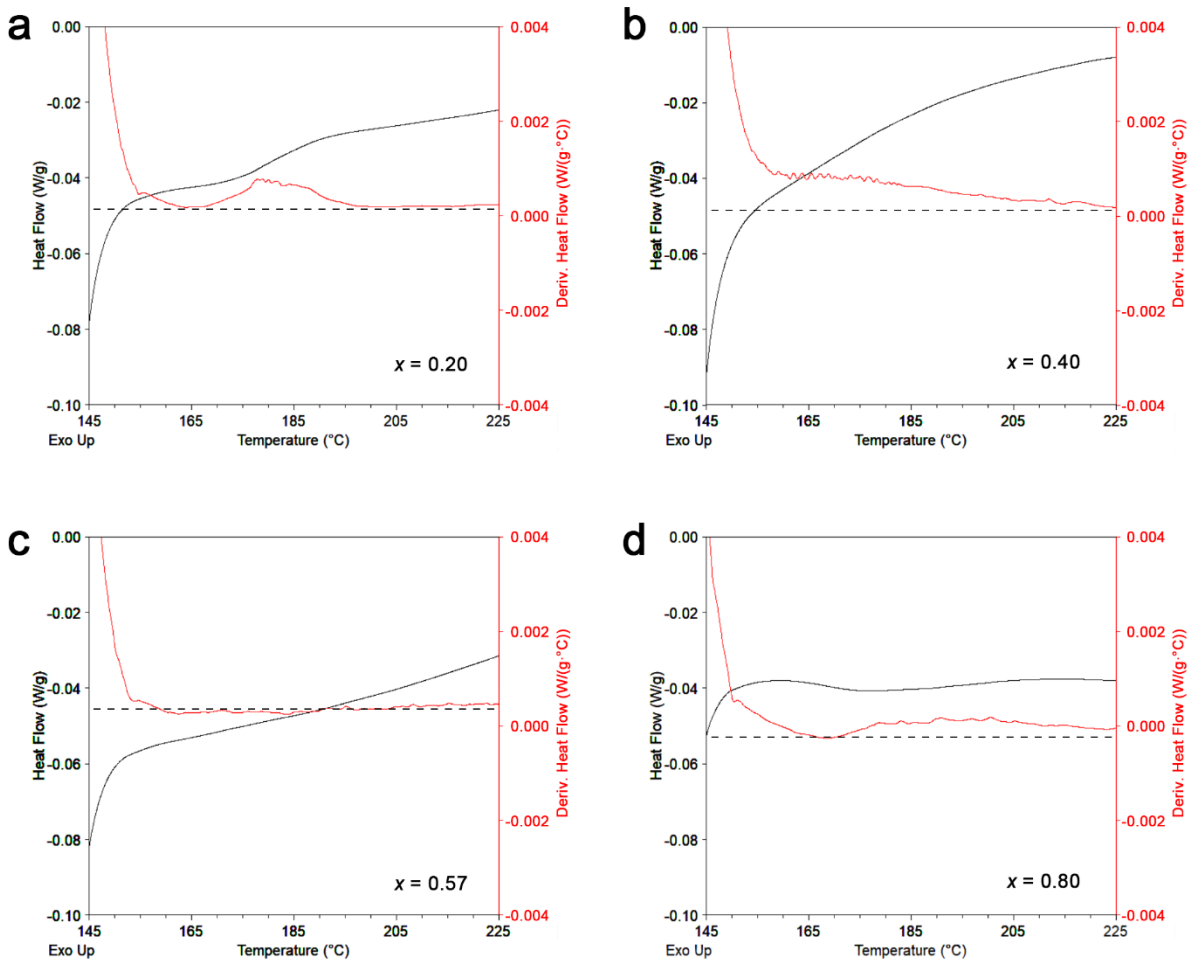

**Supplementary Figure 8.** Plots of heat flow (black curve) and its temperature derivative (red curve) for the different Bi-Sn nano-alloy samples shown in the insets of Fig. 3k in the main text. The temperature derivative of heat flow of all non-eutectic samples shows temperature-dependent variations while that of the eutectic sample  $x=0.57$  remains constant. The results mean that the phase transition takes place beyond the main peak region for the non-eutectic samples and it is therefore confirmed that the small particles in the  $x=0.57$  nano-alloy sample, which contribute to the majority of the sample surface area, still remains eutectic after ultrasonication.

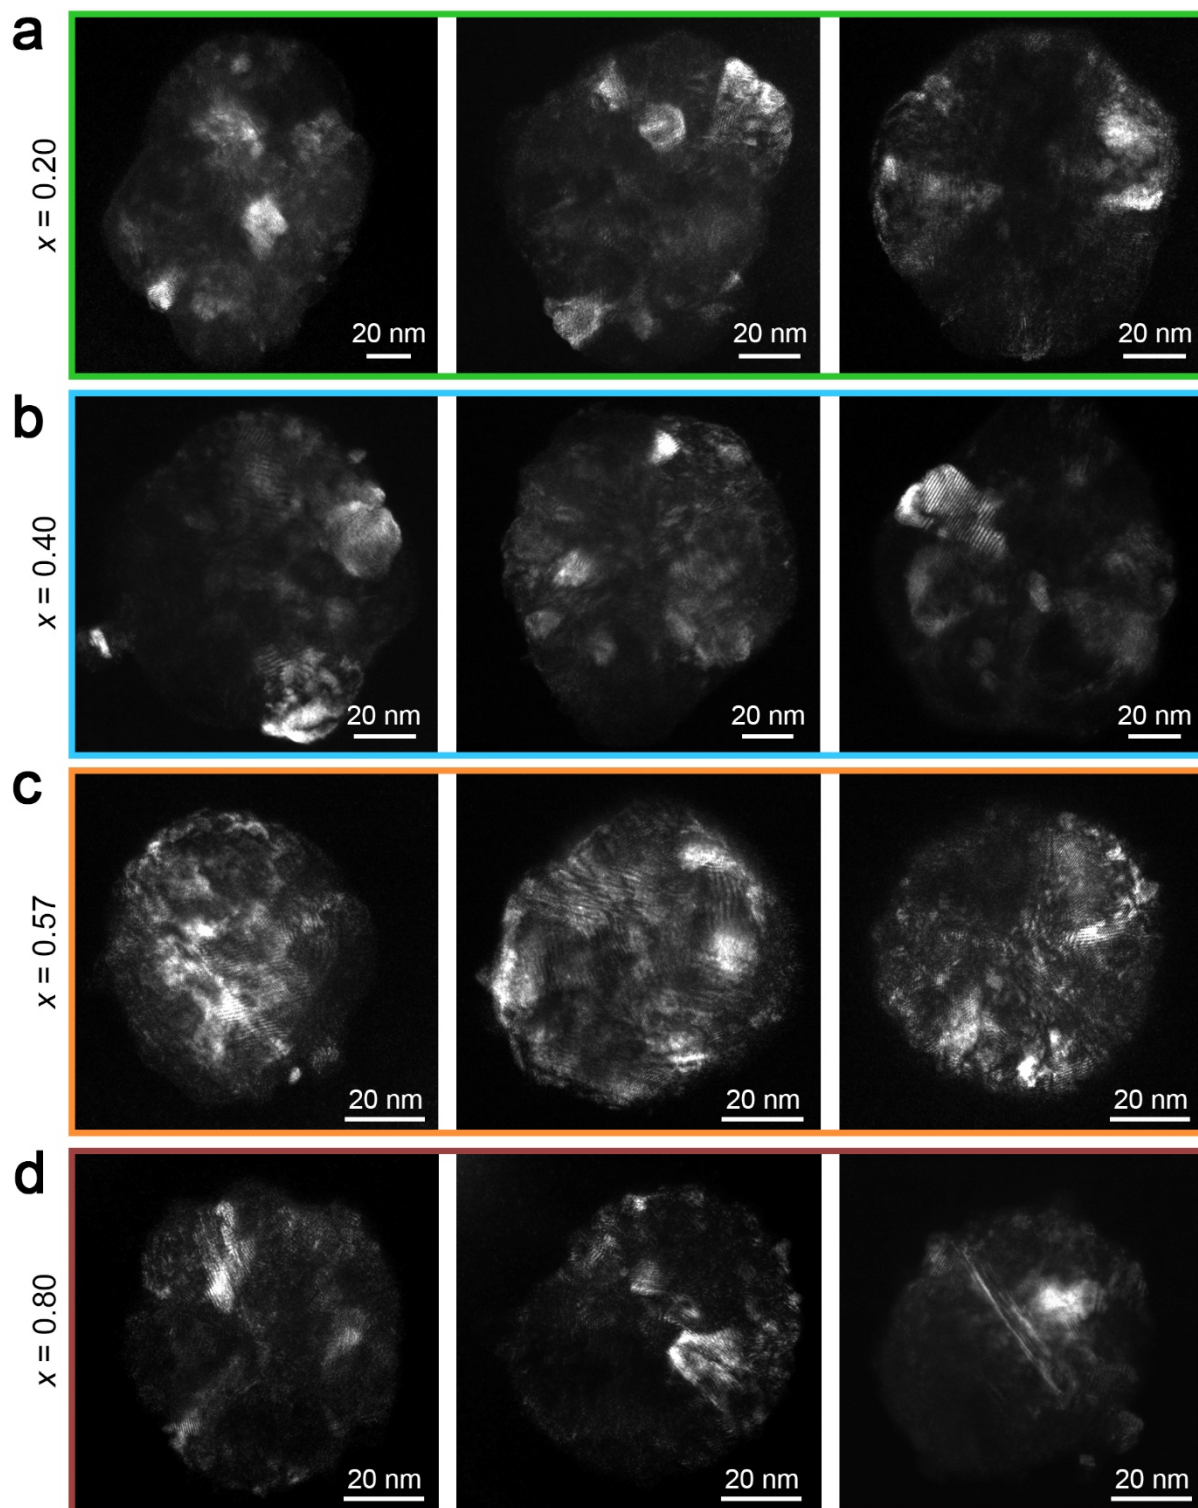

**Supplementary Figure 9.** Additional dark-field TEM images of different  $\text{Bi}_x\text{Sn}_{1-x}$  nano-alloy samples with Bi ratio  $x$  indicated.

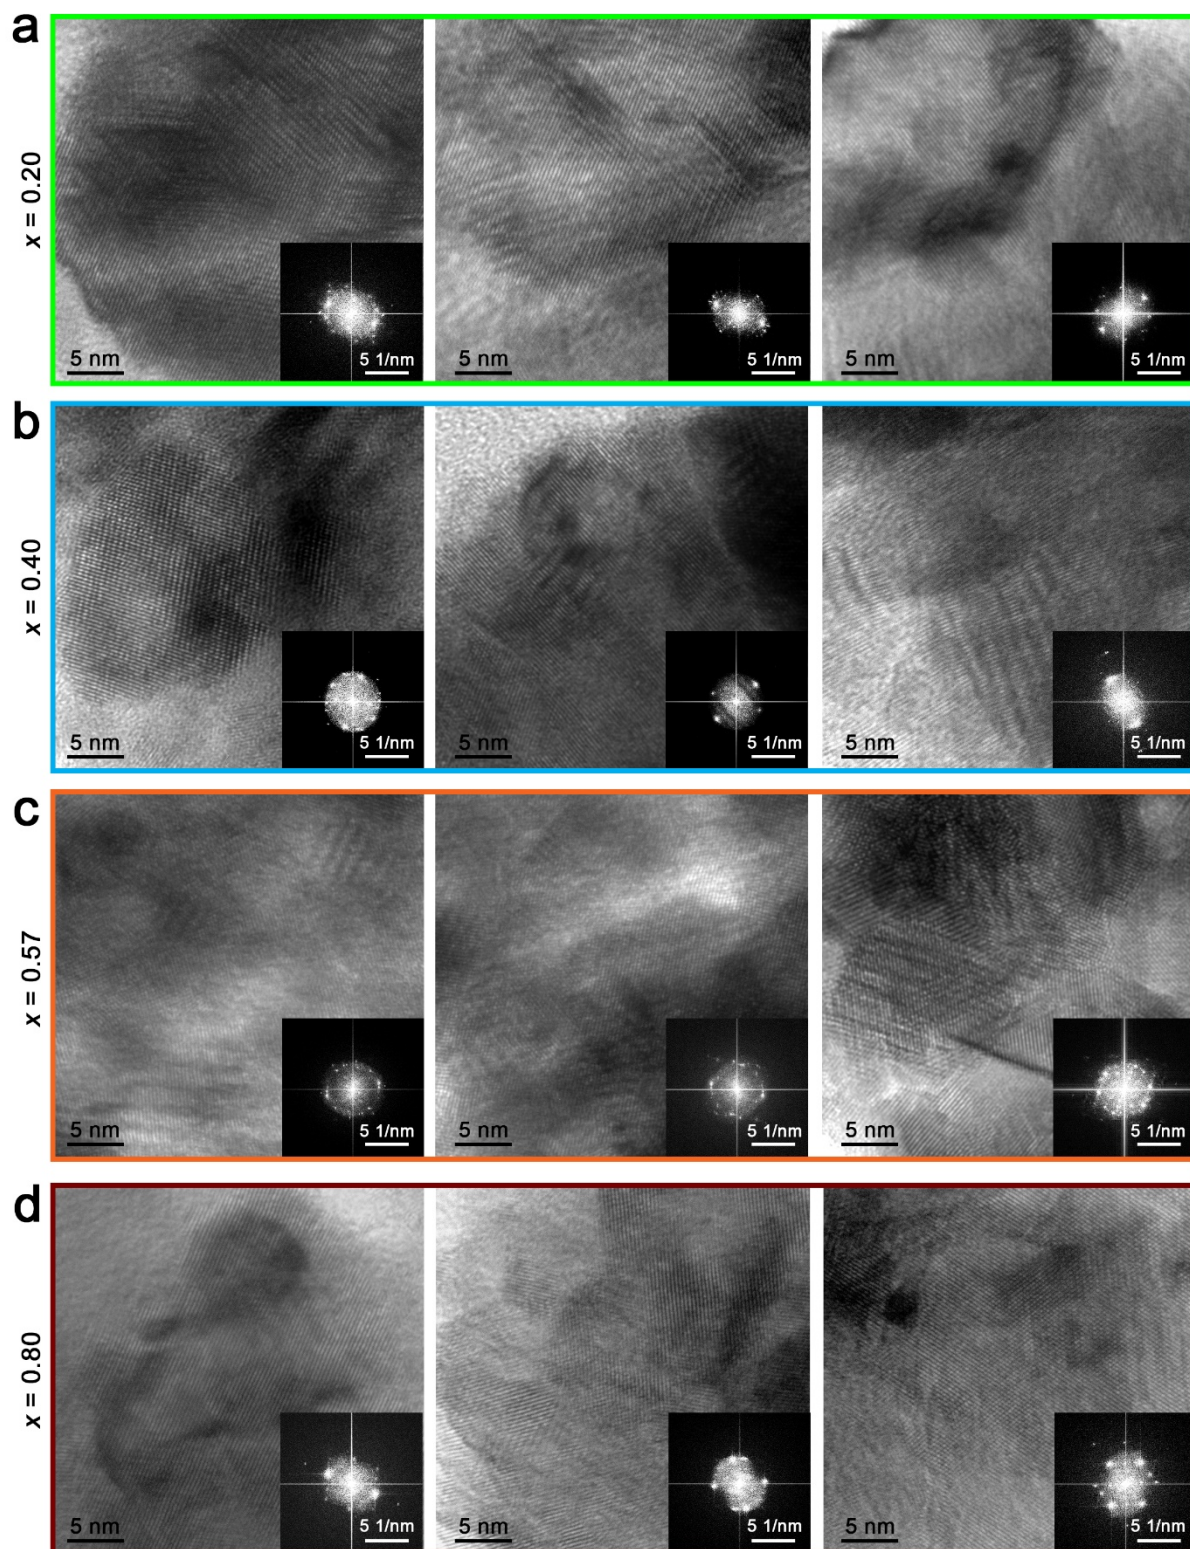

**Supplementary Figure 10.** Additional BF-HR-TEM images with the insets showing the FFTs of the Bi-Sn nano-alloys of different compositions as indicated. The eutectic nanoparticles typically show smaller grains than the non-eutectics and their omnidirectionally oriented grains render the FFT patterns circular.

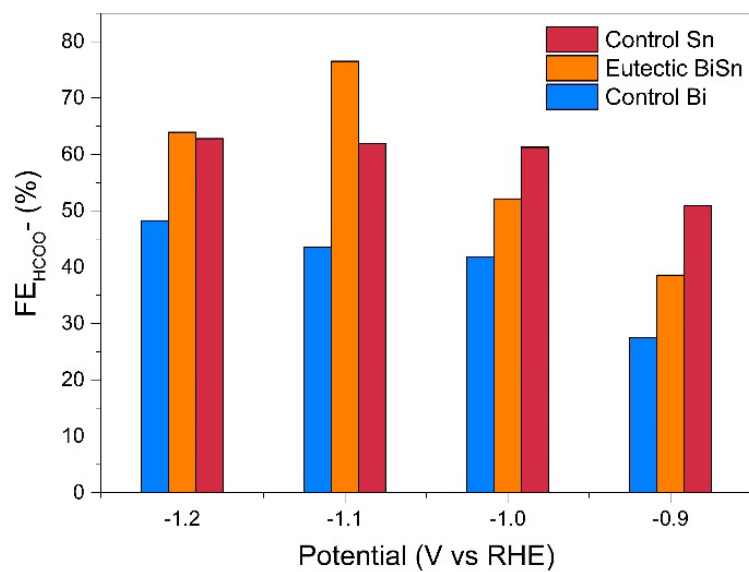

**Supplementary Figure 11.** Dependence of Faradaic efficiency for  $\text{HCOO}^-$  on applied potential for eutectic Bi-Sn nano-alloy sample and control Sn and Bi samples.

**Supplementary Table 1.** CO<sub>2</sub>RR catalytic performances of various Sn- and Bi-based catalysts.

| Catalyst                                    | Electrolyte                                   | Operating potential (V vs RHE) | Current density (mA/cm <sup>2</sup> ) | Faradaic efficiency for HCOO <sup>-</sup> (%) | Reference        |
|---------------------------------------------|-----------------------------------------------|--------------------------------|---------------------------------------|-----------------------------------------------|------------------|
| <b>Eutectic Bi-Sn</b>                       | <b>0.1 M KHCO<sub>3</sub></b>                 | <b>-1.1</b>                    | <b>10.7</b>                           | <b>78</b>                                     | <b>This work</b> |
| m-SnO <sub>2</sub>                          | 0.1 M KHCO <sub>3</sub>                       | -1.15                          | 10.8                                  | 75.2                                          | 1                |
| SnO <sub>2</sub> /Graphene                  | 0.1M NaHCO <sub>3</sub>                       | -1.16                          | 10.2                                  | 93.6                                          | 2                |
| 1D SnO <sub>2</sub> wire in tube            | 0.1 M KHCO <sub>3</sub>                       | -0.99                          | 7                                     | 63                                            | 3                |
| Heat-treated Sn dendrite                    | 0.1 M KHCO <sub>3</sub>                       | -1.36                          | 17.1                                  | 71.6                                          | 4                |
| SnO <sub>2</sub> nanosheets on carbon cloth | 0.5 M NaHCO <sub>3</sub>                      | -0.99                          | 45                                    | 87                                            | 5                |
| Bi-Sn                                       | 0.5 M KHCO <sub>3</sub> with 600 rpm stirring | -1.14                          | -61                                   | 94                                            | 6                |
| Sn/SnO <sub>x</sub> /Ti                     | 0.5 M NaHCO <sub>3</sub>                      | -0.7                           | 1.8                                   | 55                                            | 6                |
| Annealed Sn NPs                             | 0.1M KHCO <sub>3</sub>                        | -1.2                           | 4                                     | 51.5                                          | 7                |
| Bi nanosheets                               | 0.5 M NaHCO <sub>3</sub>                      | -0.8                           | -5                                    | 94                                            | 8                |
| Sn quantum sheets/Graphene                  | 0.1 M NaHCO <sub>3</sub>                      | -1.15                          | 21.5                                  | 89                                            | 9                |
| SnO <sub>2</sub> nanowires (plasma treated) | 0.1 M KHCO <sub>3</sub>                       | -0.8                           | 6                                     | 81                                            | 10               |

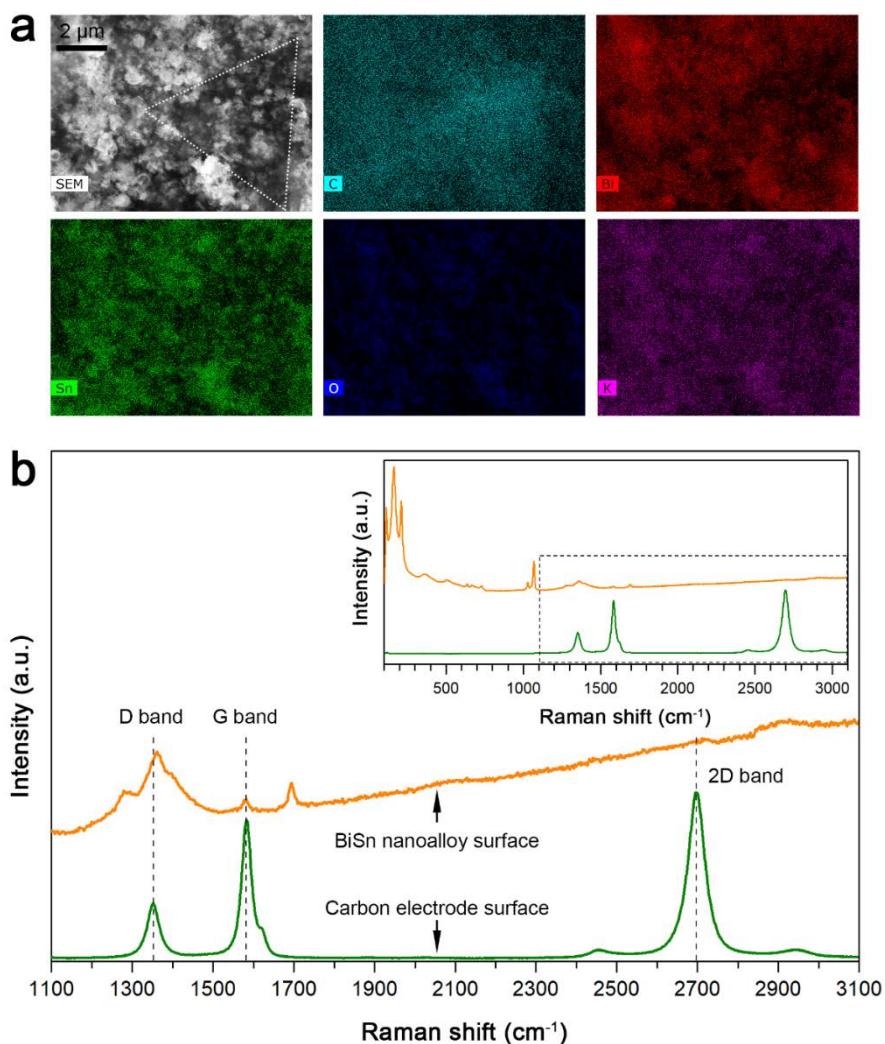

**Supplementary Figure 12.** Evidence for the formation of carbonaceous species during the CO<sub>2</sub>RR reaction. **a** SEM-EDX mapping of the nano-alloy (eutectic) surface after CO<sub>2</sub>RR reaction. The outlined triangle region, which is darker than the Bi-Sn nano-alloys under SEM, shows higher C density than other regions. This enrichment of C is supposed to be a result of direct reduction of CO<sub>2</sub> to solid C during the CO<sub>2</sub>RR reaction. **b** Raman spectra collected from the Bi-Sn nano-alloy surface (yellow curve) and from the surface of the carbon electrode used to support the Bi-Sn nano-alloy (green curve). The inset shows the extended Raman spectra of **b**. When compared with the Raman spectra of the carbon electrode, the D band of the carbon material on the Bi-Sn nano-alloy sample is slightly shifted. In addition, it does not have a 2D band at near 2700 cm<sup>-1</sup>. Such differences confirm that the carbon Raman signal should come from carbon species produced during the CO<sub>2</sub>RR reaction, not from the carbon electrode.

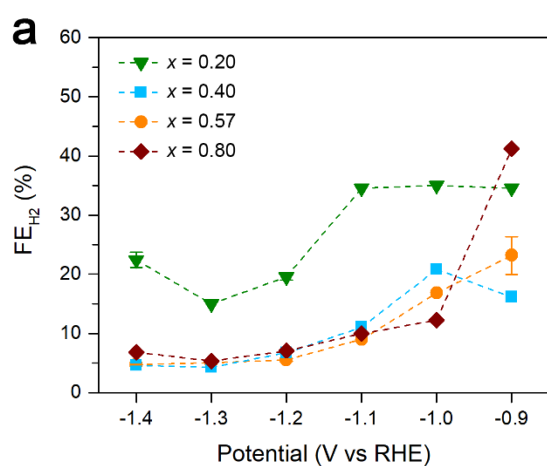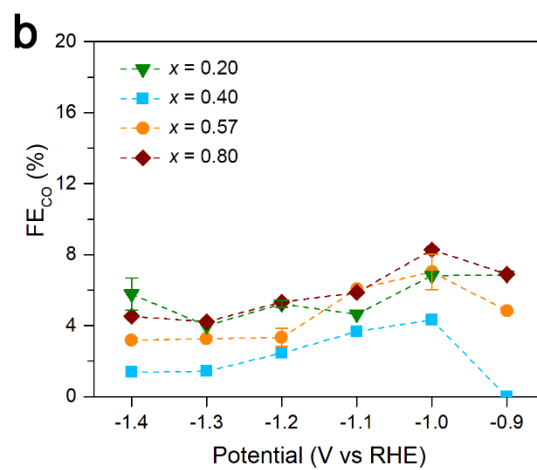

**Supplementary Figure 13.** **a** Dependence of the Faradic efficiency of H<sub>2</sub> and **b** that of CO on the applied potential for different Bi-Sn nano-alloy samples.

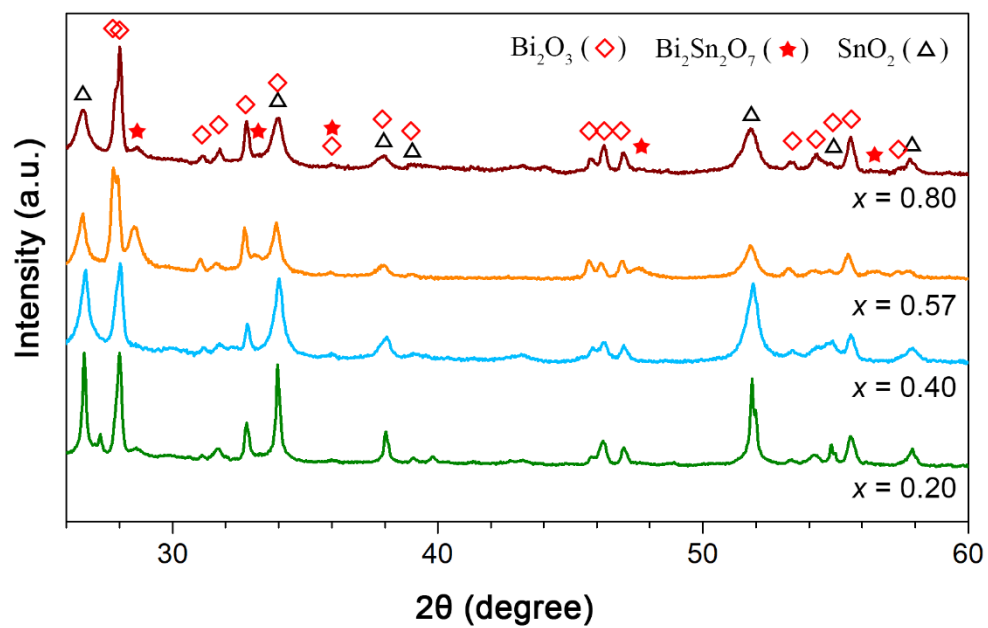

**Supplementary Figure 14.** XRD patterns of the annealed Bi-Sn nano-alloy samples with their starting Bi ratio indicated.



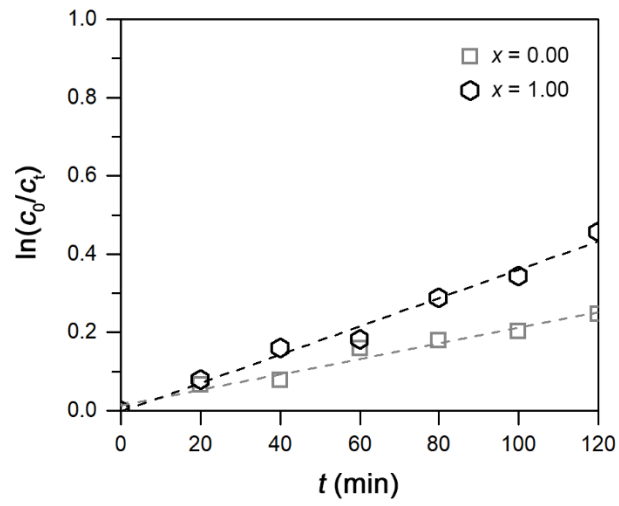

**Supplementary Figure 15.** Plots of  $\ln(c_0/c_t)$  vs  $t$  for the control Sn ( $x = 0.00$ ) and Bi ( $x = 1.00$ ) samples.

**Supplementary Table 2.** Eutectic composition and melting point of some binary alloy systems<sup>11</sup>.

| Alloy system<br>A-B | Eutectic composition<br>A <sub>wt%</sub> B <sub>wt%</sub> | Melting point of A<br>(°C) | Melting point of B<br>(°C) | Eutectic melting<br>point of A-B (°C) |
|---------------------|-----------------------------------------------------------|----------------------------|----------------------------|---------------------------------------|
| Bi-Cd               | Bi <sub>60</sub> Cd <sub>40</sub>                         | 271.4                      | 321.1                      | 146                                   |
| Bi-In               | Bi <sub>43.3</sub> In <sub>56.7</sub>                     | 271.4                      | 156.6                      | 72.7                                  |
| Bi-Li               | Bi <sub>23</sub> Li <sub>77</sub>                         | 271.4                      | 180.6                      | 175.0                                 |
| Bi-Pb               | Bi <sub>55.2</sub> Pb <sub>44.8</sub>                     | 271.4                      | 327.5                      | 125.5                                 |
| Bi-Pd               | Bi <sub>97</sub> Pd <sub>3</sub>                          | 271.4                      | 1555                       | 256                                   |
| Bi-Pt               | Bi <sub>99.2</sub> Pt <sub>0.8</sub>                      | 271.4                      | 1769                       | 259                                   |
| Bi-Sm               | Bi <sub>99</sub> Sm <sub>1</sub>                          | 271.4                      | 1074                       | 252                                   |
| Bi-Sn               | Bi <sub>57</sub> Sn <sub>43</sub>                         | 271.4                      | 232.0                      | 139                                   |
| Bi-Te               | Bi <sub>98.3</sub> Te <sub>1.7</sub>                      | 271.4                      | 449.6                      | 266                                   |
| Bi-Yb               | Bi <sub>95</sub> Yb <sub>5</sub>                          | 271.4                      | 819                        | 250                                   |
| Bi-Zn               | Bi <sub>97.3</sub> Zn <sub>2.7</sub>                      | 271.4                      | 419.6                      | 254.5                                 |
| Cd-In               | Cd <sub>25.3</sub> In <sub>74.4</sub>                     | 321.1                      | 156.6                      | 126                                   |
| Cd-Pb               | Cd <sub>17.5</sub> Pb <sub>82.5</sub>                     | 321.1                      | 327.5                      | 246                                   |
| Cd-Sb               | Cd <sub>92</sub> Sb <sub>8</sub>                          | 321.1                      | 630.8                      | 290                                   |
| Cd-Sn               | Cd <sub>32.25</sub> Sn <sub>67.75</sub>                   | 321.1                      | 232.0                      | 176                                   |
| Cd-Tl               | Cd <sub>17</sub> Tl <sub>83</sub>                         | 321.1                      | 304                        | 203.5                                 |
| Cd-Zn               | Cd <sub>82.6</sub> Zn <sub>17.4</sub>                     | 321.1                      | 419.6                      | 266                                   |
| Cu-In               | Cu <sub>0.9</sub> In <sub>99.1</sub>                      | 1064.9                     | 156.6                      | 153                                   |
| Cu-Tin              | Cu <sub>0.7</sub> Sn <sub>99.3</sub>                      | 1064.9                     | 232.0                      | 227                                   |
| Dy-Sn               | Dy <sub>1.2</sub> Sn <sub>98.8</sub>                      | 1412                       | 232.0                      | 215                                   |
| Ga-Ag               | Ga <sub>94.5</sub> Ag <sub>5.5</sub>                      | 29.8                       | 951.9                      | 25.0                                  |
| Ga-In               | Ga <sub>78.6</sub> In <sub>21.4</sub>                     | 29.8                       | 156.6                      | 15.3                                  |
| Ga-Mn               | Ga <sub>99</sub> Mn <sub>1</sub>                          | 29.8                       | 1246                       | 29.8                                  |
| Ga-Sn               | Ga <sub>86.5</sub> Sn <sub>13.5</sub>                     | 29.8                       | 232.0                      | 20.5                                  |
| Ga-Yb               | Ga <sub>99</sub> Yb <sub>1</sub>                          | 29.8                       | 819                        | 27                                    |
| Ga-Zn               | Ga <sub>96.4</sub> Zn <sub>3.4</sub>                      | 29.8                       | 419.6                      | 24.7                                  |
| Li-Pd               | Li <sub>51</sub> Pd <sub>49</sub>                         | 180.6                      | 1555                       | 145                                   |
| Li-Sn               | Li <sub>98</sub> Sn <sub>2</sub>                          | 180.6                      | 232.0                      | 179                                   |
| Li-Sr               | Li <sub>37</sub> Sr <sub>63</sub>                         | 180.6                      | 769                        | 134                                   |
| Li-Tl               | Li <sub>77</sub> Tl <sub>23</sub>                         | 180.6                      | 304                        | 175                                   |
| Li-Zn               | Li <sub>69.3</sub> Zn <sub>30.7</sub>                     | 180.6                      | 419.6                      | 161                                   |
| Mg-Sn               | Mg <sub>2.1</sub> Sn <sub>97.9</sub>                      | 650                        | 232.0                      | 203.5                                 |
| Mg-Tl               | Mg <sub>3</sub> Tl <sub>97</sub>                          | 650                        | 304                        | 202                                   |
| Pb-Pd               | Pb <sub>95.5</sub> Pd <sub>4.5</sub>                      | 327.5                      | 1555                       | 260                                   |
| Pb-Pt               | Pb <sub>95</sub> Pt <sub>5</sub>                          | 327.5                      | 1769                       | 290                                   |
| Pb-Sb               | Pb <sub>88.9</sub> Sb <sub>11.1</sub>                     | 327.5                      | 530.8                      | 251.7                                 |
| Pb-Sn               | Pb <sub>38.1</sub> Sn <sub>61.9</sub>                     | 327.5                      | 232.0                      | 183                                   |
| Pd-Sn               | Pd <sub>99</sub> Sn <sub>1</sub>                          | 1555                       | 232                        | 230                                   |
| Pd-Tl               | Pd <sub>99</sub> Tl <sub>1</sub>                          | 1555                       | 302                        | 293                                   |
| Pt-Sn               | Pt <sub>0.8</sub> Sn <sub>99.2</sub>                      | 1769                       | 232.0                      | 226                                   |
| Sb-Tl               | Sb <sub>19.7</sub> Tl <sub>80.3</sub>                     | 630.8                      | 304                        | 195                                   |
| Se-Tl               | Se <sub>47.5</sub> Tl <sub>52.5</sub>                     | 221                        | 304                        | 199                                   |
| Sn-Sr               | Sn <sub>99</sub> Sr <sub>1</sub>                          | 232.0                      | 759                        | 230                                   |
| Sn-Tl               | Sn <sub>57</sub> Tl <sub>43</sub>                         | 232.0                      | 304                        | 166                                   |
| Sn-Zn               | Sn <sub>91.2</sub> Zn <sub>8.8</sub>                      | 232.0                      | 419.6                      | 198.5                                 |
| Te-Tl               | Te <sub>42</sub> Tl <sub>58</sub>                         | 449.6                      | 304                        | 224                                   |
| Tl-Zn               | Tl <sub>97</sub> Zn <sub>3</sub>                          | 304                        | 419.6                      | 292                                   |

**Supplementary Table 3.** Properties of some proposed liquids for ultrasonication<sup>12</sup>.

| <b>Liquid</b>                            | <b>Melting point</b> | <b>Boiling point</b> | <b>Solubility in water</b> | <b>Flammability</b> |
|------------------------------------------|----------------------|----------------------|----------------------------|---------------------|
| Water                                    | 0                    | 100                  | -                          | Non-flammable       |
| Dimethyl sulfoxide (DMSO)                | 19                   | 189                  | Miscible                   | Flammable           |
| Glycerol                                 | 17.8                 | 290                  | Miscible                   | Flammable           |
| Paraffin wax                             | 37                   | > 370                | Immiscible                 | Flammable           |
| Silicone oil                             | < 0 (pour point)     | > 300                | Immiscible                 | Non-flammable       |
| AlBr <sub>3</sub>                        | 97.5                 | 257                  | Soluble                    | Non-flammable       |
| AlCl <sub>3</sub> -KCl<br>(33:67 mole %) | 90                   |                      | Soluble                    | Non-flammable       |

## Supplementary References

- 1 Daiyan, R., Lu, X., Saputera, W. H., Ng, Y. H. & Amal, R. Highly selective reduction of CO<sub>2</sub> to formate at low overpotentials achieved by a mesoporous tin oxide electrocatalyst. *ACS Sustain. Chem. Eng.* **6**, 1670-1679 (2018).
- 2 Zhang, S., Kang, P. & Meyer, T. J. Nanostructured tin catalysts for selective electrochemical reduction of carbon dioxide to formate. *J. Am. Chem. Soc.* **136**, 1734-1737 (2014).
- 3 Fan, L., Xia, Z., Xu, M., Lu, Y. & Li, Z. 1D SnO<sub>2</sub> with wire-in-tube architectures for highly selective electrochemical reduction of CO<sub>2</sub> to C1 products. *Adv. Funct. Mater.* **28**, 1706289 (2018).
- 4 Won, D. H. *et al.* Rational design of a hierarchical tin dendrite electrode for efficient electrochemical reduction of CO<sub>2</sub>. *ChemSusChem* **8**, 3092-3098 (2015).
- 5 Li, F., Chen, L., Knowles, G. P., MacFarlane, D. R. & Zhang, J. Hierarchical mesoporous SnO<sub>2</sub> nanosheets on carbon cloth: A robust and flexible electrocatalyst for CO<sub>2</sub> reduction with high efficiency and selectivity. *Angew. Chem. Int. Ed.* **56**, 505-509 (2017).
- 6 Chen, Y. & Kanan, M. W. Tin oxide dependence of the CO<sub>2</sub> reduction efficiency on tin electrodes and enhanced activity for tin/tin oxide thin-film catalysts. *J. Am. Chem. Soc.* **134**, 1986-1989 (2012).
- 7 Wu, J., Risalvato, F. G., Ma, S. & Zhou, X.-D. Electrochemical reduction of carbon dioxide III. The role of oxide layer thickness on the performance of Sn electrode in a full electrochemical cell. *J. Mater. Chem. A* **2**, 1647-1651 (2014).
- 8 Han, N. *et al.* Ultrathin bismuth nanosheets from in situ topotactic transformation for selective electrocatalytic CO<sub>2</sub> reduction to formate. *Nat. Commun.* **9**, 1320 (2018).
- 9 Lei, F. *et al.* Metallic tin quantum sheets confined in graphene toward high-efficiency carbon dioxide electroreduction. *Nat. Commun.* **7**, 12697 (2016).
- 10 Kumar, B. *et al.* Reduced SnO<sub>2</sub> porous nanowires with a high density of grain boundaries as catalysts for efficient electrochemical CO<sub>2</sub>-into-HCOOH conversion. *Angew. Chem. Int. Ed.* **56**, 3645-3649 (2017).
- 11 Baker, H. & Okamoto, H. *ASM Handbook. Vol. 3. Alloy Phase Diagrams* (ASM International, 1992).
- 12 Lide, D. R. *CRC Handbook of Chemistry and Physics Vol. 85*(CRC Press, 2004).
